# Supplementary material for: Possibilities and Limitations of the Sono-Fenton Process Using Mid-High-Frequency Ultrasound for the Degradation of Organic Pollutants
Source: MDPI journal article supplement (doi:10.3390/molecules28031113), 2023-01-22
Supplement: s1 [file s1]

## **Supporting Information**

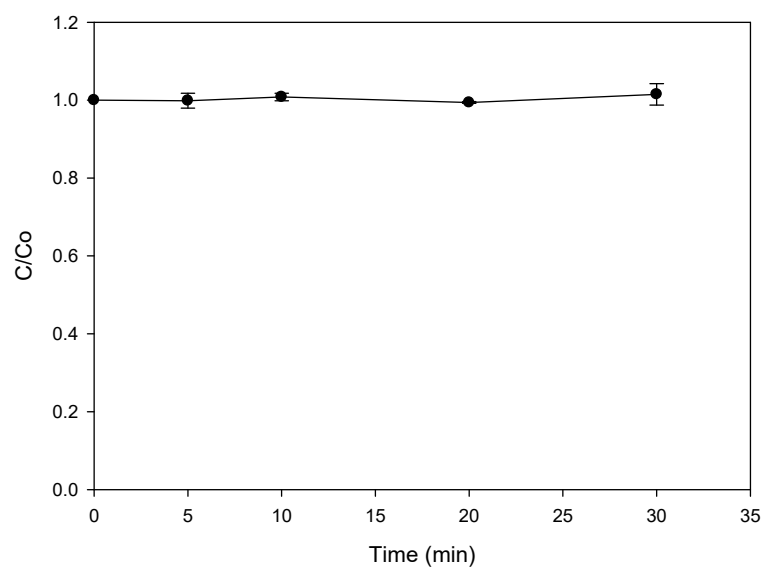

**Figure S1.** Adsorption of MO on the heterogeneous iron source (i.e., the natural mineral).  
Experimental conditions:  $[MO]_{\text{initial}}$ : 30.6  $\mu\text{M}$ ,  $[\text{natural mineral}]$ : 0.2  $\text{g L}^{-1}$ .

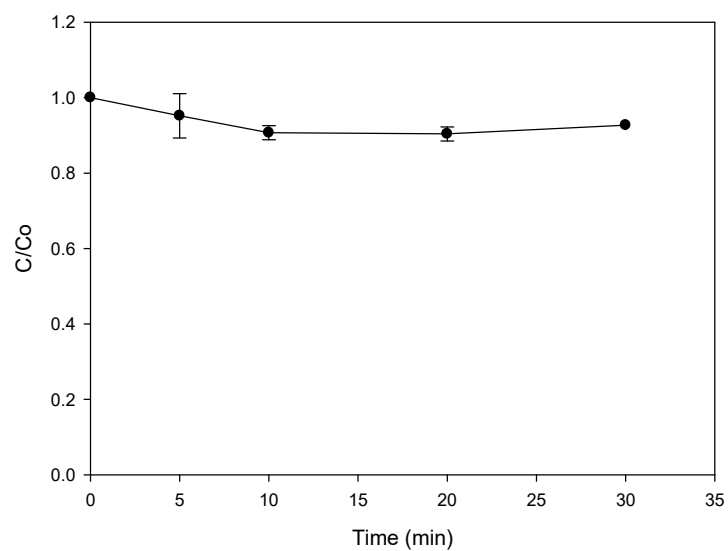

(a)

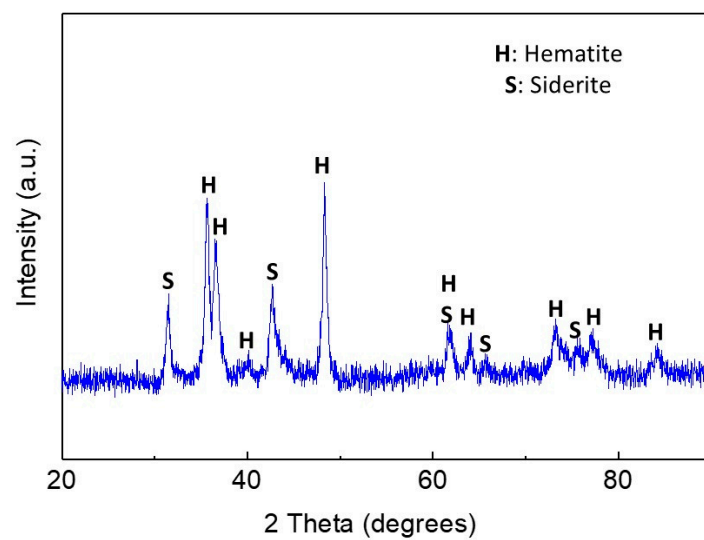

(b)

**Figure S2.** (a) Adsorption of ACE on the heterogeneous iron source (i.e., the natural mineral). Experimental conditions:  $[ACE]_{\text{initial}}$ : 30.6  $\mu\text{M}$ ,  $[\text{natural mineral}]$ : 0.2  $\text{g L}^{-1}$ . (b) XRD pattern for the Colombian natural mineral.

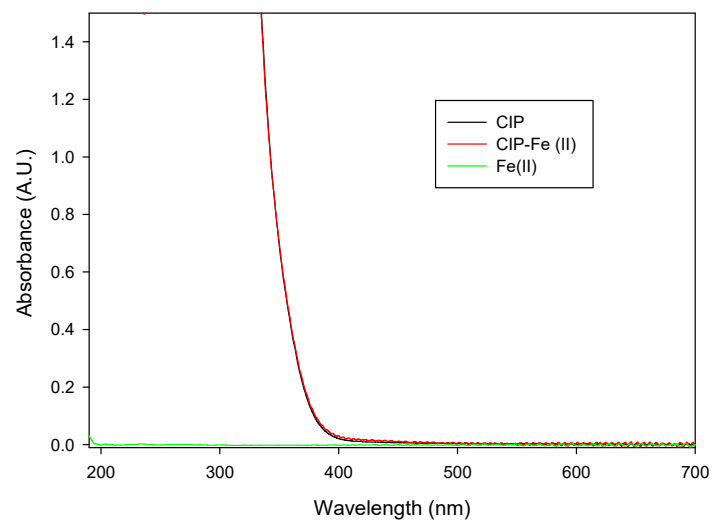

**Figure S3.** UV-Vis spectrum of CIP and its interaction with ferrous ions.

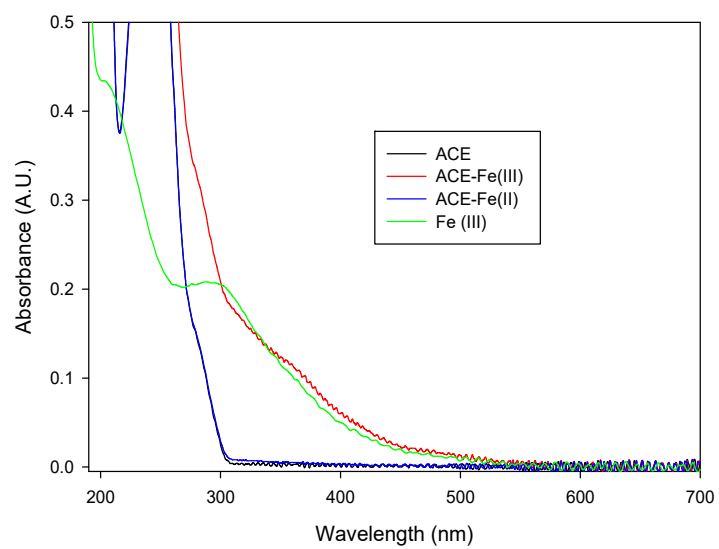

**Figure S4.** UV-Vis spectrum of ACE and its mixture with ferric and ferrous ions.

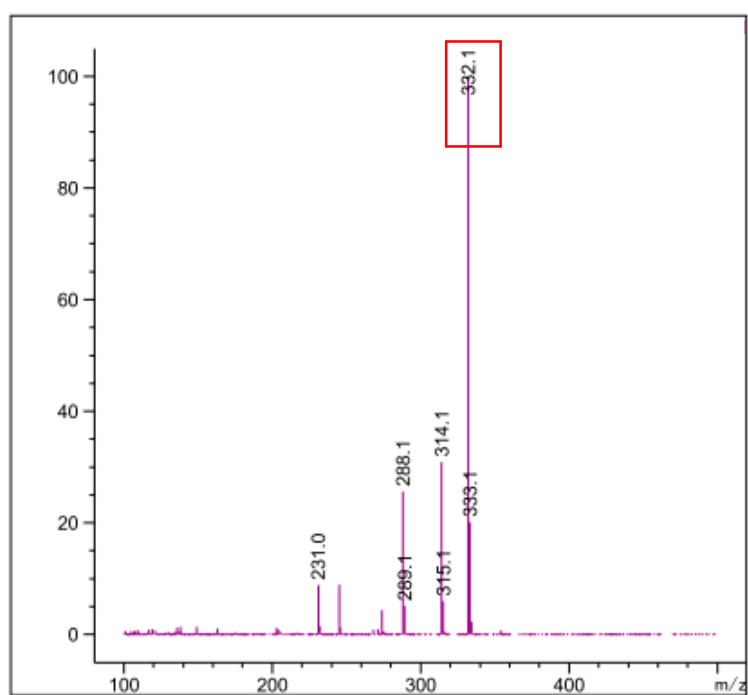

**Figure S5.** Mass spectrum of CIP.

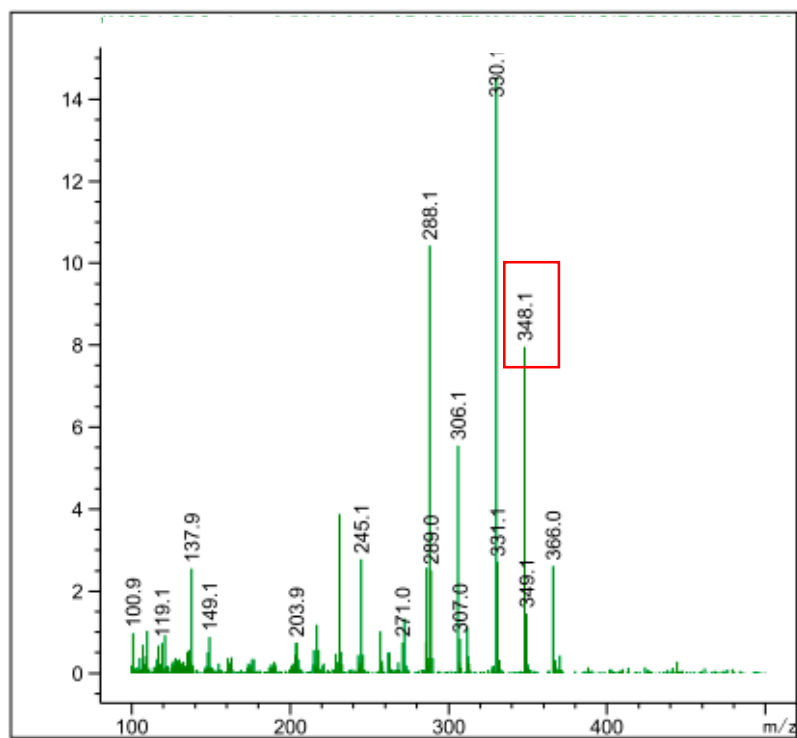

**Figure S6.** Mass spectrum of Product 1.

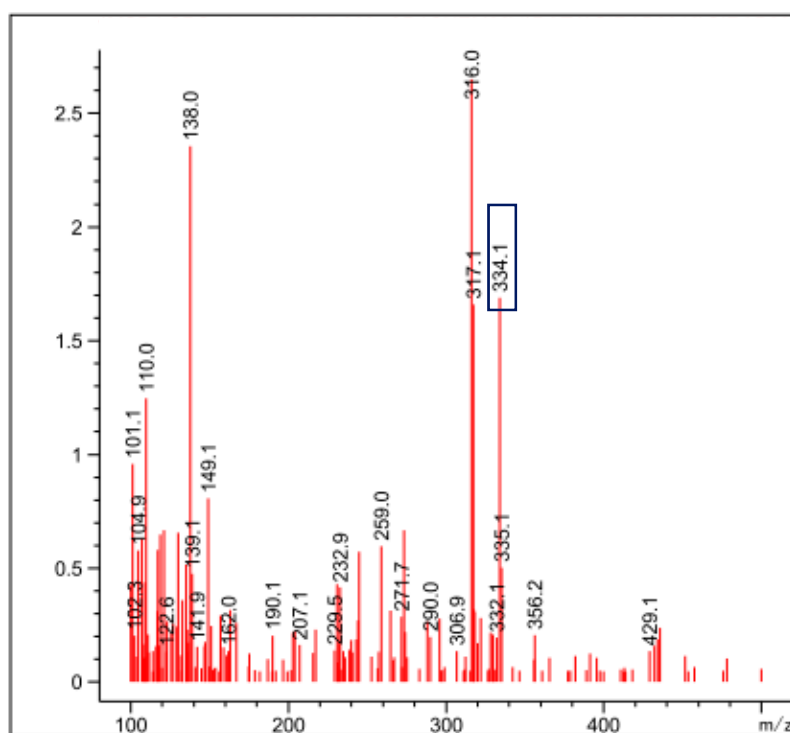

Figure S7. Mass spectrum of Product 2.



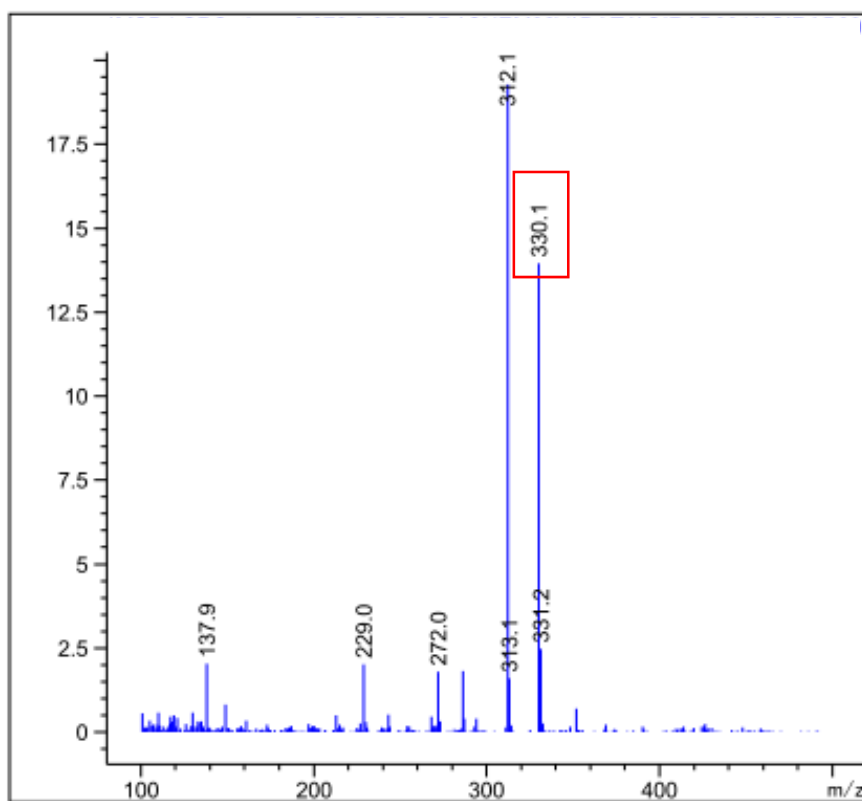

**Figure S8.** Mass spectrum of Product 3.

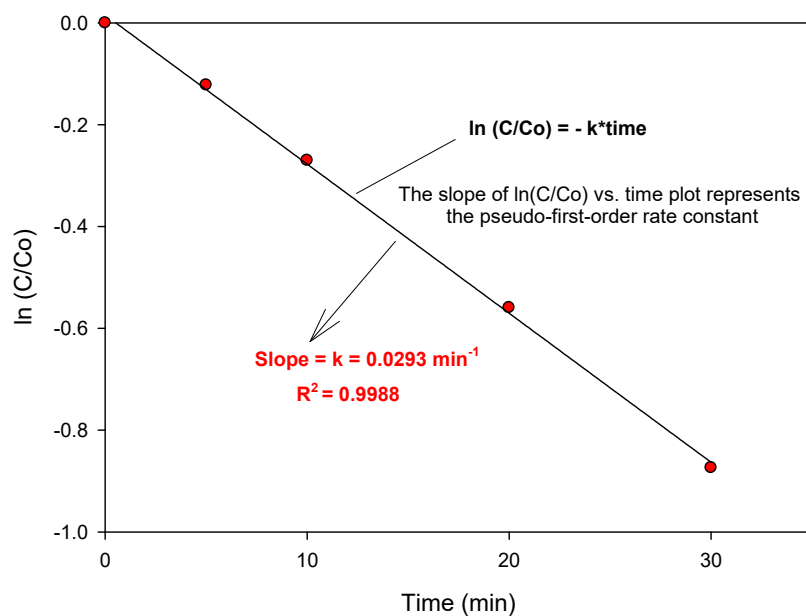

**Figure S9.** Example of the  $k$ -value determination from the  $\ln C/Co$  vs. time plot. The data in this figure correspond to degradation of MO by ultrasound alone. *Experimental conditions:*  $f$ : 375 kHz,  $P$ : 34.4 W,  $[MO]_{\text{initial}}$ : 30.6  $\mu\text{mol L}^{-1}$ ,  $\text{pH}_{\text{initial}}$ : 5.6, and  $V$ : 250 mL.

**Table S1.** Values of pseudo-first-order constants (k) for the degradation of the target pollutants.

| Experimental system    | k-value (min <sup>-1</sup> ) | Error for k (min <sup>-1</sup> ) | R <sup>2</sup> (Correlation coefficient) |
|------------------------|------------------------------|----------------------------------|------------------------------------------|
| <b>MO (Figure 2a)</b>  |                              |                                  |                                          |
| US                     | 0.0293                       | 0.0006                           | 0.9988                                   |
| US + mineral (0.02)    | 0.0280                       | 0.0007                           | 0.9981                                   |
| US + mineral (0.20)    | 0.0306                       | 0.0005                           | 0.9992                                   |
| <b>ACE (Figure 2b)</b> |                              |                                  |                                          |
| US                     | 0.0282                       | 0.0011                           | 0.9959                                   |
| US + mineral (0.20)    | 0.0257                       | 0.0010                           | 0.9954                                   |
| <b>MO (Figure 3a)</b>  |                              |                                  |                                          |
| 0 ppm                  | 0.0293                       | 0.0006                           | 0.9988                                   |
| 1 ppm                  | 0.0382                       | 0.0008                           | 0.9987                                   |
| 3 ppm                  | 0.0412                       | 0.0010                           | 0.9983                                   |
| 5 ppm                  | 0.0366                       | 0.0005                           | 0.9994                                   |
| <b>MO (Figure 3b)</b>  |                              |                                  |                                          |
| US                     | 0.0293                       | 0.0006                           | 0.9988                                   |
| US + Fe (II)           | 0.0382                       | 0.0008                           | 0.9987                                   |
| US + Fe (III)          | 0.0315                       | 0.0004                           | 0.9995                                   |
| <b>ACE (Figure 4a)</b> |                              |                                  |                                          |
| US                     | 0.0282                       | 0.0011                           | 0.9959                                   |
| US + Fe (II)           | 0.0557                       | 0.0023                           | 0.9951                                   |
| <b>CIP (Figure 4c)</b> |                              |                                  |                                          |
| US                     | 0.0233                       | 0.0012                           | 0.9923                                   |
| US + Fe (II)           | 0.0210                       | 0.0066                           | 0.7733                                   |
